# Supplementary material for: Application of Multiple-Source Data Fusion for the Discrimination of Two Botanical Origins of Magnolia Officinalis Cortex Based on E-Nose Measurements, E-Tongue Measurements, and Chemical Analysis
Source: MDPI journal article supplement (doi:10.3390/molecules27123892), 2022-06-17
Supplement: s1 [file s1]

# Application of Multiple-Source Data Fusion for the Discrimination of Two Botanical Origins of *Magnolia Officinalis* Cortex Based on E-Nose Measurements, E-Tongue Measurements, and Chemical Analysis

Wenguang Jing <sup>1</sup>, Xiaoliang Zhao <sup>2</sup>, Minghua Li <sup>1</sup>, Xiaowen Hu <sup>1</sup>, Xianlong Cheng <sup>1</sup>,  
Shuangcheng Ma <sup>1,\*</sup>  
and Feng Wei <sup>1,\*</sup>

<sup>1</sup> National Institutes for Food and Drug Control, Beijing 100050, China; jingwenguang@nifdc.org.cn (W.J.); bjlmmhh@163.com (M.L.); dreadless@126.com (X.H.); cxl@nifdc.org.cn (X.C.)

<sup>2</sup> Beijing Key Laboratory of Traditional Chinese Medicine Basic Research on Prevention and Treatment of Major Diseases, Experimental Research Center, China Academy of Chinese Medical Sciences, Beijing 100700, China; zhaoxiaoliang1218@aliyun.com

\* Correspondence: masc@nifdc.org.cn (S.M.); weifeng@nifdc.org.cn (F.W.); Tel./Fax: +86-010-5385-2101(S.M.)

**Table S1.** Response values ( $G/G_0$ ) of the ten e-nose sensors for all samples (mean, duplicate=3) <sup>1</sup>

| NO. | Origin | e-nose sensors |        |       |       |       |        |        |       |        |       |
|-----|--------|----------------|--------|-------|-------|-------|--------|--------|-------|--------|-------|
|     |        | W1C            | W5S    | W3C   | W6S   | W5C   | W1S    | W1W    | W2S   | W2W    | W3S   |
| S1  | JYHP   | 0.390          | 30.707 | 0.602 | 1.066 | 0.764 | 7.621  | 34.856 | 2.502 | 29.197 | 0.950 |
| S2  | JYHP   | 0.620          | 8.124  | 0.780 | 1.151 | 0.896 | 5.444  | 38.569 | 1.686 | 28.975 | 0.963 |
| S3  | JYHP   | 0.306          | 21.694 | 0.544 | 1.249 | 0.686 | 10.502 | 36.950 | 3.512 | 34.634 | 1.032 |
| S4  | JYHP   | 0.450          | 11.865 | 0.655 | 1.204 | 0.795 | 5.693  | 27.523 | 2.174 | 25.773 | 1.030 |
| S5  | JYHP   | 0.713          | 6.202  | 0.847 | 1.126 | 0.944 | 4.091  | 28.658 | 1.458 | 22.507 | 0.978 |
| S6  | JYHP   | 0.402          | 15.151 | 0.629 | 1.161 | 0.776 | 8.477  | 32.395 | 2.624 | 31.060 | 0.945 |
| S7  | JYHP   | 0.397          | 15.620 | 0.622 | 1.118 | 0.771 | 7.731  | 32.548 | 2.639 | 30.803 | 0.977 |
| S8  | JYHP   | 0.481          | 10.345 | 0.687 | 1.051 | 0.831 | 5.177  | 28.197 | 2.031 | 25.535 | 0.984 |
| S9  | JYHP   | 0.335          | 18.649 | 0.567 | 1.076 | 0.710 | 8.647  | 31.579 | 3.143 | 30.386 | 1.062 |
| S10 | JYHP   | 0.641          | 7.811  | 0.789 | 1.074 | 0.896 | 3.892  | 32.080 | 1.622 | 25.587 | 1.046 |
| S11 | JYHP   | 0.564          | 18.604 | 0.709 | 1.158 | 0.843 | 4.340  | 29.887 | 1.827 | 21.246 | 1.128 |
| S12 | JYHP   | 0.441          | 26.379 | 0.634 | 1.144 | 0.789 | 5.681  | 31.372 | 2.370 | 23.582 | 1.171 |
| S13 | JYHP   | 0.390          | 33.287 | 0.599 | 1.110 | 0.758 | 7.154  | 32.068 | 2.844 | 25.853 | 1.270 |
| S14 | JYHP   | 0.444          | 26.581 | 0.634 | 1.111 | 0.788 | 5.833  | 33.860 | 2.372 | 24.389 | 1.214 |
| S15 | JYHP   | 0.531          | 22.433 | 0.693 | 1.224 | 0.836 | 5.514  | 36.649 | 2.134 | 25.284 | 1.195 |
| S16 | JYHP   | 0.579          | 18.605 | 0.722 | 1.180 | 0.844 | 5.077  | 26.911 | 2.006 | 20.474 | 1.179 |
| S17 | JYHP   | 0.556          | 20.020 | 0.711 | 1.255 | 0.849 | 5.760  | 37.282 | 2.152 | 24.927 | 1.223 |
| S18 | JYHP   | 0.469          | 24.005 | 0.640 | 1.192 | 0.775 | 6.492  | 29.972 | 2.446 | 23.023 | 1.225 |
| S19 | JYHP   | 0.453          | 29.047 | 0.639 | 1.279 | 0.791 | 7.785  | 42.870 | 2.844 | 30.156 | 1.262 |
| S20 | JYHP   | 0.384          | 35.641 | 0.593 | 1.332 | 0.755 | 9.317  | 40.485 | 3.509 | 30.594 | 1.303 |

|     |      |       |        |       |       |       |        |        |       |        |       |
|-----|------|-------|--------|-------|-------|-------|--------|--------|-------|--------|-------|
| S21 | JYHP | 0.457 | 27.004 | 0.655 | 1.055 | 0.805 | 6.934  | 31.785 | 2.631 | 26.707 | 1.288 |
| S22 | JYHP | 0.356 | 40.028 | 0.582 | 1.065 | 0.739 | 9.505  | 36.026 | 3.606 | 30.835 | 1.361 |
| S23 | JYHP | 0.426 | 32.000 | 0.636 | 1.105 | 0.794 | 8.485  | 39.464 | 3.297 | 30.998 | 1.453 |
| S24 | JYHP | 0.499 | 23.141 | 0.694 | 1.127 | 0.846 | 6.718  | 31.505 | 2.666 | 25.711 | 1.394 |
| S25 | JYHP | 0.380 | 33.937 | 0.597 | 1.224 | 0.753 | 10.163 | 34.706 | 3.745 | 29.526 | 1.461 |
| S26 | JYHP | 0.425 | 28.826 | 0.643 | 1.229 | 0.803 | 8.632  | 33.502 | 3.371 | 28.822 | 1.445 |
| S27 | JYHP | 0.306 | 45.615 | 0.543 | 1.375 | 0.705 | 12.359 | 34.209 | 4.839 | 30.243 | 1.502 |
| S28 | JYHP | 0.513 | 23.008 | 0.700 | 1.262 | 0.847 | 7.219  | 34.011 | 2.814 | 27.251 | 1.473 |
| S29 | JYHP | 0.399 | 33.213 | 0.618 | 1.204 | 0.774 | 9.326  | 34.874 | 3.489 | 30.210 | 1.428 |
| S30 | JYHP | 0.417 | 29.614 | 0.628 | 1.228 | 0.786 | 9.025  | 34.738 | 3.458 | 28.289 | 1.493 |
| S31 | AYHP | 0.844 | 6.041  | 0.893 | 1.210 | 0.938 | 2.894  | 15.019 | 1.520 | 7.700  | 1.085 |
| S32 | AYHP | 0.849 | 7.910  | 0.899 | 1.223 | 0.944 | 2.948  | 17.597 | 1.567 | 8.310  | 1.100 |
| S33 | AYHP | 0.802 | 7.013  | 0.869 | 1.195 | 0.934 | 3.012  | 12.274 | 1.600 | 8.216  | 1.124 |
| S34 | AYHP | 0.866 | 4.869  | 0.918 | 1.167 | 0.957 | 2.590  | 8.819  | 1.480 | 5.919  | 1.095 |
| S35 | AYHP | 0.844 | 7.426  | 0.898 | 1.203 | 0.947 | 3.182  | 15.873 | 1.620 | 8.585  | 1.164 |
| S36 | AYHP | 0.682 | 12.517 | 0.798 | 1.244 | 0.906 | 4.030  | 18.062 | 1.940 | 11.887 | 1.146 |
| S37 | AYHP | 0.858 | 4.836  | 0.911 | 1.184 | 0.954 | 2.647  | 9.202  | 1.500 | 6.313  | 1.142 |
| S38 | AYHP | 0.865 | 4.225  | 0.917 | 1.186 | 0.955 | 2.735  | 8.589  | 1.515 | 5.895  | 1.163 |
| S39 | AYHP | 0.812 | 6.382  | 0.886 | 1.192 | 0.947 | 3.217  | 11.736 | 1.648 | 7.570  | 1.181 |
| S40 | AYHP | 0.822 | 6.106  | 0.889 | 1.188 | 0.947 | 3.322  | 11.212 | 1.653 | 8.019  | 1.191 |
| S41 | AYHP | 0.922 | 11.751 | 0.979 | 1.002 | 1.011 | 2.400  | 35.315 | 1.103 | 15.550 | 0.928 |
| S42 | AYHP | 0.791 | 19.472 | 0.891 | 0.983 | 0.973 | 3.086  | 37.013 | 1.263 | 20.325 | 0.926 |
| S43 | AYHP | 0.949 | 10.774 | 0.999 | 0.948 | 1.023 | 2.155  | 29.635 | 1.067 | 13.989 | 0.978 |
| S44 | AYHP | 0.983 | 8.729  | 1.027 | 0.898 | 1.036 | 1.797  | 24.114 | 0.982 | 11.696 | 0.922 |
| S45 | AYHP | 0.805 | 18.500 | 0.897 | 0.926 | 0.974 | 3.052  | 33.974 | 1.245 | 19.376 | 0.990 |
| S46 | AYHP | 0.996 | 10.520 | 1.021 | 0.869 | 1.031 | 1.812  | 28.071 | 0.893 | 13.045 | 0.991 |
| S47 | AYHP | 0.823 | 20.568 | 0.898 | 0.952 | 0.973 | 2.906  | 36.477 | 1.111 | 20.155 | 1.002 |
| S48 | AYHP | 0.980 | 13.449 | 1.007 | 0.998 | 1.026 | 2.214  | 33.572 | 0.959 | 15.179 | 1.002 |
| S49 | AYHP | 1.061 | 4.299  | 1.066 | 0.947 | 1.043 | 1.448  | 12.628 | 0.828 | 6.361  | 0.937 |
| S50 | AYHP | 1.012 | 9.728  | 1.027 | 1.060 | 1.031 | 2.080  | 26.878 | 0.928 | 12.459 | 0.989 |
| S51 | AYHP | 0.877 | 13.515 | 0.935 | 1.078 | 0.985 | 3.291  | 29.817 | 1.367 | 13.026 | 1.201 |
| S52 | AYHP | 0.849 | 15.840 | 0.914 | 1.120 | 0.976 | 3.727  | 31.981 | 1.487 | 15.980 | 1.241 |
| S53 | AYHP | 0.784 | 18.534 | 0.873 | 1.127 | 0.960 | 4.133  | 31.920 | 1.619 | 17.842 | 1.254 |
| S54 | AYHP | 0.832 | 19.499 | 0.905 | 1.119 | 0.975 | 3.892  | 35.483 | 1.548 | 17.925 | 1.242 |
| S55 | AYHP | 0.894 | 11.457 | 0.950 | 1.095 | 0.993 | 3.028  | 23.338 | 1.332 | 11.741 | 1.193 |
| S56 | AYHP | 0.757 | 19.092 | 0.861 | 1.142 | 0.958 | 4.067  | 29.484 | 1.593 | 17.166 | 1.234 |
| S57 | AYHP | 0.855 | 15.319 | 0.921 | 1.158 | 0.983 | 3.745  | 30.204 | 1.504 | 15.073 | 1.287 |
| S58 | AYHP | 0.862 | 16.660 | 0.926 | 1.199 | 0.984 | 4.053  | 31.941 | 1.566 | 15.174 | 1.327 |
| S59 | AYHP | 0.728 | 20.351 | 0.843 | 1.225 | 0.949 | 4.693  | 28.371 | 1.762 | 17.731 | 1.286 |
| S60 | AYHP | 0.932 | 5.731  | 0.980 | 1.206 | 1.002 | 2.681  | 11.970 | 1.298 | 6.681  | 1.221 |

---

1 S1~S30 belongs to JYHP and S31~60 belongs to AYHP.

**Table S2.** Response values of e-tongue sensors for all samples (mean, n=3, mV)<sup>1</sup>.

| NO. | Origin | E-tongue sensor |            |             |               |               |       |          |           |
|-----|--------|-----------------|------------|-------------|---------------|---------------|-------|----------|-----------|
|     |        | Sourness        | Bitterness | Astringency | Aftertaste- B | Aftertaste- A | Umami | Richness | Saltiness |
| S1  | JYHP   | -24.60          | 16.37      | 7.84        | 5.35          | 0.36          | 4.43  | 0.63     | -16.38    |
| S2  | JYHP   | -25.35          | 15.80      | 7.70        | 4.91          | 0.39          | 4.90  | 0.67     | -15.76    |
| S3  | JYHP   | -25.28          | 17.43      | 8.21        | 5.8           | 0.58          | 4.47  | 0.68     | -16.46    |
| S4  | JYHP   | -25.61          | 18.2       | 8.05        | 6.04          | 0.62          | 4.60  | 0.71     | -16.18    |
| S5  | JYHP   | -23.64          | 13.23      | 7.79        | 2.94          | 0.18          | 4.20  | 0.60     | -16.85    |
| S6  | JYHP   | -23.63          | 16.33      | 9.39        | 5.43          | 0.6           | 3.72  | 0.75     | -17.48    |
| S7  | JYHP   | -24.66          | 17.04      | 8.14        | 5.75          | 0.49          | 4.63  | 0.66     | -16.5     |
| S8  | JYHP   | -25.55          | 16.77      | 8.45        | 5.46          | 0.62          | 4.59  | 0.70     | -16.65    |
| S9  | JYHP   | -26.67          | 19.23      | 9.33        | 6.66          | 0.76          | 4.47  | 0.72     | -17.09    |
| S10 | JYHP   | -23.24          | 15.33      | 8.41        | 4.55          | 0.37          | 4.14  | 0.67     | -17.1     |
| S11 | JYHP   | -25.07          | 15.05      | 8.67        | 3.75          | 0.20          | 5.61  | 0.01     | -15.97    |
| S12 | JYHP   | -24.42          | 16.76      | 8.76        | 5.16          | 0.38          | 5.13  | 0.08     | -16.34    |
| S13 | JYHP   | -26.35          | 18.05      | 10.47       | 4.83          | 0.38          | 4.45  | 0.06     | -17.08    |
| S14 | JYHP   | -23.97          | 14.44      | 8.6         | 3.83          | 0.23          | 5.20  | -0.01    | -16.23    |
| S15 | JYHP   | -24.24          | 16.12      | 8.54        | 4.72          | 0.27          | 5.12  | 0.08     | -16.23    |
| S16 | JYHP   | -25.13          | 16.81      | 8.81        | 4.99          | 0.32          | 5.36  | 0.07     | -16.23    |
| S17 | JYHP   | -24.15          | 14.97      | 8.71        | 3.95          | 0.22          | 5.18  | 0.03     | -16.38    |
| S18 | JYHP   | -24.84          | 17.54      | 8.91        | 5.89          | 0.51          | 5.28  | 0.06     | -16.35    |
| S19 | JYHP   | -23.88          | 15.23      | 7.86        | 4.58          | 0.28          | 5.38  | 0.02     | -15.92    |
| S20 | JYHP   | -23.49          | 15.97      | 8.17        | 4.88          | 0.28          | 5.16  | 0.02     | -16.24    |
| S21 | JYHP   | -25.14          | 17.87      | 8.09        | 5.74          | 0.36          | 5.45  | 0.26     | -15.91    |
| S22 | JYHP   | -25.75          | 17.03      | 8.16        | 5.52          | 0.53          | 5.68  | 0.24     | -15.78    |
| S23 | JYHP   | -22.12          | 14.75      | 7.75        | 4.82          | 0.32          | 4.79  | 0.24     | -16.37    |
| S24 | JYHP   | -23.84          | 15.58      | 8.26        | 4.71          | 0.36          | 4.96  | 0.24     | -16.29    |
| S25 | JYHP   | -24.94          | 16.42      | 7.43        | 5.54          | 0.46          | 5.82  | 0.24     | -15.51    |
| S26 | JYHP   | -25.03          | 16.67      | 8.10        | 5.57          | 0.39          | 5.33  | 0.30     | -15.79    |
| S27 | JYHP   | -25.03          | 16.21      | 8.04        | 4.46          | 0.30          | 5.47  | 0.25     | -16.01    |
| S28 | JYHP   | -25.59          | 15.46      | 7.51        | 4.63          | 0.31          | 5.96  | 0.19     | -15.65    |
| S29 | JYHP   | -25.64          | 16.04      | 8.39        | 4.56          | 0.33          | 5.61  | 0.21     | -16.19    |
| S30 | JYHP   | -23.94          | 16.36      | 7.67        | 4.82          | 0.27          | 5.44  | 0.2      | -16.20    |
| S31 | AYHP   | -28.01          | 12.46      | 5.56        | 2.38          | 0.05          | 8.37  | 0.18     | -13.11    |
| S32 | AYHP   | -26.37          | 13.41      | 4.01        | 3.52          | 0.13          | 8.55  | 0.21     | -12.4     |
| S33 | AYHP   | -28.54          | 13.01      | 6.70        | 1.99          | 0.06          | 8.23  | 0.14     | -14.42    |
| S34 | AYHP   | -27.69          | 12.96      | 5.92        | 2.40          | 0.06          | 8.38  | 0.15     | -13.66    |
| S35 | AYHP   | -28.59          | 14.66      | 6.14        | 3.35          | 0.16          | 8.50  | 0.19     | -13.61    |
| S36 | AYHP   | -30.67          | 23.78      | 7.9         | 6.89          | 0.32          | 9.06  | 0.22     | -14.59    |
| S37 | AYHP   | -27.92          | 13.35      | 5.76        | 2.35          | 0.07          | 7.74  | 0.19     | -14.67    |
| S38 | AYHP   | -31.6           | 14.77      | 5.33        | 2.56          | 0.04          | 10.51 | 0.07     | -11.51    |
| S39 | AYHP   | -31.38          | 14.58      | 7.38        | 2.65          | 0.12          | 9.76  | 0.13     | -13.49    |
| S40 | AYHP   | -28.02          | 16.26      | 6.98        | 3.97          | 0.26          | 7.85  | 0.19     | -14.72    |
| S41 | AYHP   | -23.9           | 12.56      | 4.76        | 3.53          | 0.27          | 6.78  | 0.01     | -13.57    |

|     |      |        |       |      |      |      |      |       |        |
|-----|------|--------|-------|------|------|------|------|-------|--------|
| S42 | AYHP | -24.65 | 19.42 | 5.36 | 6.47 | 0.36 | 6.78 | 0.00  | -13.9  |
| S43 | AYHP | -23.92 | 19.86 | 4.12 | 6.79 | 0.25 | 6.98 | 0.06  | -13.16 |
| S44 | AYHP | -22.94 | 21.03 | 4.25 | 8.18 | 0.3  | 6.76 | 0.12  | -13.48 |
| S45 | AYHP | -24.05 | 15.8  | 5.91 | 4.69 | 0.34 | 6.44 | 0.02  | -14.58 |
| S46 | AYHP | -23.81 | 18.2  | 6.50 | 4.62 | 0.17 | 6.24 | 0.03  | -14.84 |
| S47 | AYHP | -24.1  | 15.76 | 6.48 | 4.88 | 0.41 | 6.48 | 0.01  | -14.78 |
| S48 | AYHP | -23.28 | 18.62 | 6.24 | 5.02 | 0.22 | 6.45 | 0.03  | -14.97 |
| S49 | AYHP | -25.39 | 13.74 | 5.85 | 3.35 | 0.25 | 7.12 | -0.05 | -13.8  |
| S50 | AYHP | -23.96 | 12.35 | 4.35 | 3.27 | 0.26 | 7.14 | -0.03 | -13.14 |
| S51 | AYHP | -24.72 | 10.06 | 6.75 | 0.96 | 0.08 | 6.43 | -0.07 | -14.73 |
| S52 | AYHP | -25    | 13.70 | 6.03 | 3.82 | 0.27 | 6.94 | -0.01 | -13.92 |
| S53 | AYHP | -24.09 | 13.08 | 8.41 | 2.68 | 0.22 | 5.39 | -0.02 | -16.32 |
| S54 | AYHP | -24.78 | 14.17 | 5.82 | 3.65 | 0.25 | 6.95 | -0.06 | -14.23 |
| S55 | AYHP | -24.35 | 13.39 | 4.92 | 3.44 | 0.24 | 7.17 | -0.07 | -13.33 |
| S56 | AYHP | -24.76 | 16.63 | 7.05 | 4.75 | 0.38 | 6.50 | -0.02 | -15.09 |
| S57 | AYHP | -23.99 | 12.94 | 6.21 | 3.03 | 0.24 | 6.50 | -0.06 | -14.28 |
| S58 | AYHP | -23.70 | 13.62 | 6.72 | 3.34 | 0.24 | 6.43 | -0.02 | -15.02 |
| S59 | AYHP | -24.98 | 15.53 | 8.13 | 4.31 | 0.43 | 6.30 | -0.08 | -15.60 |
| S60 | AYHP | -28.17 | 12.02 | 5.57 | 1.73 | 0.11 | 8.16 | -0.13 | -12.98 |

---

1 S1-S30 belongs to JYHP and S31~60 belongs to AYHP.

**Table S3.** Results of multi-component quantitative analysis (mean, n=2, mg/g) and proportionate features <sup>1</sup>

| NO. | Syringin | Magnoflorine | Mag B <sup>+</sup> | Mag A <sup>+</sup> | Honokiol | Magnolol | Pipm <sup>+</sup> | Magnocurarine | β-eudesmol | THM    | PBA   | PHM   |
|-----|----------|--------------|--------------------|--------------------|----------|----------|-------------------|---------------|------------|--------|-------|-------|
| S1  | 4.292    | 1.744        | 44.494             | 6.690              | 17.137   | 30.837   | 10.628            | 2.047         | .120       | 47.974 | 6.651 | .556  |
| S2  | 4.406    | 1.535        | 21.241             | 4.345              | 17.073   | 14.409   | 4.291             | 1.356         | .000       | 31.482 | 4.889 | 1.185 |
| S3  | 2.575    | 1.393        | 18.549             | 4.473              | 44.203   | 39.667   | 14.438            | 1.790         | 1.320      | 83.870 | 4.147 | 1.114 |
| S4  | 1.542    | 1.011        | 11.590             | 4.550              | 37.826   | 29.862   | 9.110             | 1.568         | .380       | 67.688 | 2.547 | 1.267 |
| S5  | 3.150    | 2.070        | 29.160             | 3.060              | 16.270   | 17.540   | 5.390             | 1.750         | .000       | 33.810 | 9.529 | .928  |
| S6  | 2.640    | 1.050        | 27.950             | 8.860              | 25.350   | 23.930   | 6.140             | 1.370         | .810       | 49.280 | 3.155 | 1.059 |
| S7  | 1.906    | 1.250        | 13.466             | 3.274              | 23.925   | 27.164   | 7.580             | 1.477         | .000       | 51.089 | 4.113 | .881  |
| S8  | 2.493    | 1.256        | 20.711             | 3.110              | 29.678   | 21.248   | 4.712             | 1.914         | .230       | 50.926 | 6.659 | 1.397 |
| S9  | 1.979    | 1.009        | 8.455              | 2.794              | 40.267   | 38.866   | 9.140             | 1.309         | .980       | 79.133 | 3.026 | 1.036 |
| S10 | 3.274    | 1.393        | 24.718             | 4.143              | 15.111   | 17.640   | 2.926             | 2.092         | 1.460      | 32.751 | 5.966 | .857  |
| S11 | 1.930    | 1.000        | 15.900             | 3.470              | 13.980   | 13.310   | 3.300             | 1.090         | .050       | 27.290 | 4.582 | 1.050 |
| S12 | 3.080    | 1.805        | 27.726             | 4.500              | 33.139   | 29.110   | 9.740             | 1.628         | .550       | 62.249 | 6.161 | 1.138 |
| S13 | 3.883    | 1.065        | 21.176             | 4.128              | 27.920   | 22.306   | 9.350             | 1.299         | .710       | 50.226 | 5.130 | 1.252 |
| S14 | 1.630    | 1.390        | 15.360             | 4.060              | 32.750   | 30.200   | 15.430            | 1.870         | .760       | 62.950 | 3.783 | 1.084 |
| S15 | 2.834    | 1.156        | 17.674             | 3.738              | 21.409   | 19.010   | 6.363             | 1.373         | .710       | 40.419 | 4.728 | 1.126 |
| S16 | 3.828    | 1.501        | 54.275             | 12.326             | 30.015   | 22.629   | 7.657             | 3.121         | 1.160      | 52.644 | 4.403 | 1.326 |
| S17 | 3.138    | 2.040        | 3.521              | 2.510              | 19.769   | 17.518   | 5.670             | 2.588         | .010       | 37.287 | 1.403 | 1.128 |
| S18 | 2.582    | 1.047        | 24.306             | 3.954              | 45.706   | 53.858   | 13.364            | 1.048         | .260       | 99.564 | 6.147 | .849  |
| S19 | 3.268    | 1.646        | 27.036             | 4.513              | 23.815   | 25.902   | 7.396             | 1.624         | .810       | 49.717 | 5.991 | .919  |
| S20 | 4.134    | 1.763        | 38.359             | 6.089              | 29.214   | 41.750   | 11.166            | 2.139         | 1.210      | 70.964 | 6.300 | .700  |
| S21 | 3.295    | 1.031        | 12.825             | 1.764              | 22.691   | 22.508   | 7.335             | 1.175         | .530       | 45.199 | 7.270 | 1.008 |
| S22 | 3.937    | 1.057        | 14.440             | 6.552              | 37.634   | 31.742   | 12.607            | 1.672         | .000       | 69.376 | 2.204 | 1.186 |
| S23 | 2.151    | 1.401        | 15.493             | 2.828              | 26.091   | 30.536   | 6.860             | 1.255         | .700       | 56.627 | 5.478 | .854  |
| S24 | 1.815    | 1.070        | 12.585             | 3.094              | 24.631   | 17.140   | 6.159             | 1.494         | .200       | 41.771 | 4.068 | 1.437 |

|     |       |       |        |        |        |        |        |       |       |        |       |       |
|-----|-------|-------|--------|--------|--------|--------|--------|-------|-------|--------|-------|-------|
| S25 | 2.201 | 1.206 | 9.989  | 5.061  | 32.554 | 34.357 | 8.874  | 1.445 | .530  | 66.911 | 1.974 | .948  |
| S26 | 1.980 | 1.250 | 27.620 | 4.810  | 28.640 | 23.080 | 6.770  | 1.490 | 1.700 | 51.720 | 5.742 | 1.241 |
| S27 | 2.920 | 2.370 | 7.050  | 15.030 | 7.990  | 14.900 | .000   | 3.930 | .000  | 22.890 | .469  | .536  |
| S28 | 3.733 | 1.297 | 35.840 | 4.716  | 21.849 | 18.247 | 4.831  | 1.557 | .680  | 40.096 | 7.600 | 1.197 |
| S29 | 3.324 | 1.375 | 31.615 | 5.190  | 25.727 | 23.060 | 11.924 | 2.002 | .860  | 48.787 | 6.092 | 1.116 |
| S30 | 2.125 | 1.624 | 18.879 | 13.247 | 25.090 | 23.296 | 6.652  | 1.974 | .480  | 48.386 | 1.425 | 1.077 |
| S31 | 2.542 | 2.349 | 6.361  | 8.863  | 5.431  | 9.765  | .969   | 3.919 | .390  | 15.196 | .718  | .556  |
| S32 | 3.789 | 2.265 | 9.816  | 14.421 | 9.885  | 17.921 | 1.006  | 4.341 | 1.200 | 27.806 | .681  | .552  |
| S33 | 2.473 | 1.381 | 4.329  | 4.494  | 4.235  | 8.248  | 1.391  | 1.858 | .140  | 12.483 | .963  | .513  |
| S34 | 3.962 | 1.184 | 5.349  | 11.865 | 4.515  | 8.710  | .764   | 3.013 | .100  | 13.225 | .451  | .518  |
| S35 | 2.712 | 2.358 | 4.450  | 8.547  | 7.934  | 14.461 | .783   | 3.004 | .590  | 22.395 | .521  | .549  |
| S36 | 3.568 | 1.608 | 12.257 | 8.505  | 15.400 | 23.517 | 2.732  | 2.106 | .570  | 38.917 | 1.441 | .655  |
| S37 | 3.328 | 1.760 | 5.369  | 18.264 | 8.267  | 11.358 | .904   | 3.053 | .850  | 19.625 | .294  | .728  |
| S38 | 4.701 | 1.544 | 5.231  | 11.665 | 4.039  | 5.594  | .893   | 3.656 | .110  | 9.633  | .448  | .722  |
| S39 | 3.593 | 2.100 | 10.659 | 12.582 | 8.404  | 11.731 | 1.461  | .982  | .040  | 20.135 | .847  | .716  |
| S40 | 2.195 | 2.186 | 3.372  | 10.029 | 9.319  | 19.772 | .802   | 2.225 | .620  | 29.091 | .336  | .471  |
| S41 | 2.994 | 2.109 | 6.319  | 11.400 | 8.919  | 16.529 | .755   | 3.544 | .750  | 25.448 | .554  | .540  |
| S42 | 3.811 | 1.719 | 13.388 | 8.801  | 11.866 | 18.842 | 2.340  | 2.145 | .490  | 30.708 | 1.521 | .630  |
| S43 | 3.263 | 2.617 | 6.412  | 11.178 | 7.934  | 14.525 | .833   | 3.913 | .840  | 22.459 | .574  | .546  |
| S44 | 3.323 | 2.594 | 7.244  | 11.282 | 9.094  | 16.773 | .834   | 4.289 | .960  | 25.867 | .642  | .542  |
| S45 | 3.895 | 1.690 | 16.240 | 9.397  | 11.745 | 18.874 | 2.618  | 2.222 | .120  | 30.619 | 1.728 | .622  |
| S46 | 2.537 | 1.114 | 6.148  | 5.743  | 4.458  | 5.737  | .841   | 1.549 | .520  | 10.195 | 1.071 | .777  |
| S47 | 4.045 | 1.716 | 15.665 | 8.838  | 12.900 | 20.416 | 2.675  | 2.319 | 2.580 | 33.316 | 1.772 | .632  |
| S48 | 2.858 | 1.037 | 7.477  | 5.467  | 5.308  | 6.850  | .790   | 1.598 | .220  | 12.158 | 1.368 | .775  |
| S49 | 4.205 | 1.170 | 13.473 | 14.306 | 5.743  | 11.546 | .909   | 2.833 | .270  | 17.289 | .942  | .497  |
| S50 | 3.651 | 2.371 | 8.264  | 13.661 | 8.742  | 16.489 | .797   | 4.235 | 1.010 | 25.231 | .605  | .530  |

|     |       |       |        |        |        |        |       |       |       |        |       |       |
|-----|-------|-------|--------|--------|--------|--------|-------|-------|-------|--------|-------|-------|
| S51 | 3.310 | 1.620 | 13.090 | 10.940 | 10.700 | 17.010 | 2.190 | 1.880 | .000  | 27.710 | 1.197 | .629  |
| S52 | 3.219 | 2.657 | 6.399  | 12.286 | 10.714 | 19.914 | .871  | 3.436 | 1.820 | 30.628 | .521  | .538  |
| S53 | 2.170 | 1.190 | 14.070 | 10.520 | 4.330  | 8.370  | .000  | 2.540 | .410  | 12.700 | 1.337 | .517  |
| S54 | 2.756 | 1.251 | 9.733  | 14.363 | 8.181  | 17.520 | 1.001 | 2.603 | 1.330 | 25.701 | .678  | .467  |
| S55 | 3.120 | 2.531 | 6.481  | 13.961 | 8.463  | 16.066 | .829  | 4.176 | .980  | 24.529 | .464  | .527  |
| S56 | 4.052 | 1.798 | 12.835 | 11.361 | 12.827 | 19.863 | 2.335 | 2.300 | .450  | 32.690 | 1.130 | .646  |
| S57 | 3.202 | 2.693 | 6.770  | 10.510 | 8.482  | 15.744 | .831  | 4.134 | .760  | 24.226 | .644  | .539  |
| S58 | 3.016 | 2.315 | 6.808  | 10.472 | 9.476  | 17.404 | .800  | 3.411 | .920  | 26.880 | .650  | .544  |
| S59 | 3.360 | 1.613 | 13.468 | 10.929 | 13.733 | 21.180 | 2.424 | 2.154 | .550  | 34.913 | 1.232 | .648  |
| S60 | 2.429 | 1.142 | 13.656 | 2.974  | 19.805 | 17.230 | 3.038 | 1.232 | .750  | 37.035 | 4.592 | 1.149 |

<sup>1</sup> S1~S30 belongs to JYHP and S31~60 belongs to AYHP. \*n.d., not detected. # Mag B=Magnoloside B; Mag A=Magnoloside A; Pipm=Piperitylmagnolol.
